# Supplementary material for: Precancerous Cervix in Human Immunodeficiency Virus Infected Women Thirty Years Old and above in Northern Uganda
Source: Hindawi journal article supplement (doi:10.1155/2016/5473681), 2016-01-01
Supplement: f1 [file 5473681.f1.pdf]

## Supplementary Material S1: Symptoms and concerns reported during cervical cancer screening

| Characteristic                              | HIV-positive women with PCCL |                | Total (%) | P-value |
|---------------------------------------------|------------------------------|----------------|-----------|---------|
|                                             | No<br>No. (%)                | Yes<br>No. (%) |           |         |
| <b>Menstrual flow</b>                       |                              |                |           | 0.25    |
| Heavy                                       | 52 (96.3)                    | 2 (3.7)        | 54        |         |
| Moderate                                    | 742 (96.6)                   | 26 (3.4)       | 768       |         |
| scanty                                      | 21 (91.3)                    | 2 (8.7)        | 23        |         |
| <b>Vaginal/valval itching</b>               |                              |                |           | 0.37    |
| Yes                                         | 106 (95.5)                   | 5 (4.5)        | 111       |         |
| No                                          | 829 (97.1)                   | 25 (2.9)       | 854       |         |
| <b>Fever</b>                                |                              |                |           | 0.23    |
| Yes                                         | 27 (93.1)                    | 2 (6.9)        | 29        |         |
| No                                          | 888 (96.9)                   | 28 (3.1)       | 916       |         |
| <b>Pain during intercourse or urination</b> |                              |                |           | 1.00    |
| Yes                                         | 47 (97.9)                    | 1 (2.1)        | 48        |         |
| No                                          | 848 (96.8)                   | 28 (3.2)       | 876       |         |
| <b>Bleeding during sex</b>                  |                              |                |           | 1.00    |
| Yes                                         | 29 (100.0)                   | 0 (0.0)        | 29        |         |
| No                                          | 914 (96.8)                   | 30 (3.2)       | 949       |         |
